# Supplementary material
Source: PubMed Central journal article supplement (PMC3752004)
Supplement: NIHMS449853-supplement-1_si_001.pdf [file NIHMS449853-supplement-1_si_001.pdf]

Supporting Information for

# Fragment-based drug discovery using a multi-domain, parallel MD-MM/PBSA screening protocol

*Tian Zhu, Hyun Lee, Hao Lei, Christopher Jones, Kavankumar Patel, Michael E. Johnson\* and Kirk E. Hevener\**

Center for Pharmaceutical Biotechnology, University of Illinois at Chicago, 900 S Ashland Ave., Suite 3100, Chicago, IL 60607-7173 (USA)

\*To whom correspondence should be addressed.

*KEH*: Phone: 312-996-5388. Fax: 312-413-9303. E-mail: [khevener@uic.edu](mailto:khevener@uic.edu)

*MEJ*: Phone: 312-996-9114. Fax: 312-413-9303. E-mail: [mjohnson@uic.edu](mailto:mjohnson@uic.edu)

## Contents

|                                                                                                                      |     |
|----------------------------------------------------------------------------------------------------------------------|-----|
| 1. Summary table of full screening results by NMR, SPR and computational methods.....                                | S3  |
| 2. Effect of different entropy calculation methods and solute dielectric constants on enrichment of the subset. .... | S11 |
| 3. Effect of MM/PBSA components on enrichment of the subset .....                                                    | S12 |
| 4. The time evolutions of the RMSD plots for the complexes of CAIR and AIR with PurE. ....                           | S13 |
| 5. The time evolutions of enthalpy fluctuations for the complexes of CAIR and AIR with PurE. ....                    | S14 |
| 6. Effect of multiple conformations on enrichment. ....                                                              | S15 |

## 1. Summary table of full screening results by NMR, SPR and computational methods.

Table S1. NMR, SPR and computational screening results against Zenobia library.

| ID     | Binding by NMR | Binding by SPR | Competition STD NMR | NHA  | Delta_H (kcal/mol) | SD <sup>4</sup> | Delta_S (kcal/mol) | Delta_G (kcal/mol) | LE   | Gold Score |
|--------|----------------|----------------|---------------------|------|--------------------|-----------------|--------------------|--------------------|------|------------|
| ZT0004 | N <sup>1</sup> | Y <sup>2</sup> | ND <sup>3</sup>     | 11.0 | -24.4              | 2.7             | -23.8              | -0.6               | 0.1  | 25.0       |
| ZT0006 | N              | N              | ND                  | 9.0  | -13.6              | 1.9             | -14.0              | 0.4                | 0.0  | 35.0       |
| ZT0010 | Y              | Y              | Y                   | 11.0 | -40.4              | 4.4             | -12.0              | -28.4              | 2.6  | 32.4       |
| ZT0008 | Y              | N              | ND                  | 9.0  | -20.1              | 2.8             | -17.8              | -2.3               | 0.3  | 24.4       |
| ZT0009 | N              | N              | ND                  | 11.0 | -15.4              | 2.7             | -14.0              | -1.4               | 0.1  | 19.4       |
| ZT0054 | Y              | Y              | Y                   | 8.0  | -34.8              | 3.6             | -19.1              | -15.7              | 2.0  | 34.8       |
| ZT0012 | N              | N              | ND                  | 7.0  | -15.6              | 2.0             | -22.6              | 7.1                | -1.0 | 22.5       |
| ZT0013 | N              | N              | ND                  | 8.0  | -11.9              | 1.5             | -10.1              | -1.8               | 0.2  | 29.4       |
| ZT0017 | N              | Y              | ND                  | 11.0 | -29.9              | 3.7             | -22.4              | -7.5               | 0.7  | 31.4       |
| ZT0788 | Y              | Y              | ND                  | 12.0 | -29.9              | 3.5             | -10.8              | -19.1              | 1.6  | 30.7       |
| ZT0020 | N              | Y              | ND                  | 10.0 | -16.2              | 2.2             | -14.0              | -2.2               | 0.2  | 26.4       |
| ZT0763 | Y              | Y              | Y                   | 11.0 | -21.0              | 2.8             | -5.5               | -15.5              | 1.4  | 30.2       |
| ZT0023 | N              | N              | ND                  | 9.0  | -4.9               | 1.0             | -21.6              | 16.6               | -1.8 | 24.3       |
| ZT0024 | N              | N              | ND                  | 8.0  | -16.1              | 2.3             | -14.3              | -1.8               | 0.2  | 28.2       |
| ZT0025 | N              | Y              | ND                  | 8.0  | -18.6              | 2.6             | -23.0              | 4.4                | -0.5 | 27.6       |
| ZT0073 | Y              | Y              | Y                   | 13.0 | -31.7              | 3.9             | -13.9              | -17.8              | 1.4  | 30.3       |
| ZT0027 | N              | N              | ND                  | 8.0  | -15.4              | 3.3             | -23.0              | 7.6                | -0.9 | 27.5       |
| ZT0028 | N              | Y              | ND                  | 8.0  | -14.1              | 2.4             | -16.5              | 2.4                | -0.3 | 28.5       |
| ZT0029 | N              | N              | ND                  | 8.0  | -18.0              | 2.6             | -17.1              | -0.9               | 0.1  | 26.2       |
| ZT0030 | N              | N              | ND                  | 8.0  | -17.9              | 2.4             | -20.2              | 2.2                | -0.3 | 28.2       |
| ZT0031 | N              | N              | ND                  | 8.0  | -20.3              | 3.0             | -22.3              | 1.9                | -0.2 | 27.8       |
| ZT0032 | N              | N              | ND                  | 8.0  | -14.9              | 2.1             | -12.6              | -2.2               | 0.3  | 26.5       |
| ZT0037 | N              | N              | ND                  | 7.0  | -9.3               | 1.6             | -12.9              | 3.6                | -0.5 | 28.5       |
| ZT0038 | N              | N              | ND                  | 7.0  | -22.3              | 3.0             | -24.6              | 2.3                | -0.3 | 23.0       |
| ZT0039 | N              | N              | ND                  | 7.0  | -14.1              | 2.1             | -13.3              | -0.9               | 0.1  | 22.9       |
| ZT0040 | N              | N              | ND                  | 7.0  | -9.9               | 1.7             | -7.9               | -2.0               | 0.3  | 26.9       |
| ZT0041 | N              | N              | ND                  | 7.0  | -15.4              | 2.6             | -19.1              | 3.7                | -0.5 | 22.1       |
| ZT0042 | N              | N              | ND                  | 7.0  | -16.4              | 2.5             | -19.3              | 2.9                | -0.4 | 24.5       |
| ZT0044 | Y              | N              | ND                  | 8.0  | -22.6              | 2.5             | -15.7              | -6.9               | 0.9  | 29.5       |
| ZT0393 | Y              | Y              | Y                   | 9.0  | -18.0              | 2.4             | -6.2               | -11.8              | 1.3  | 29.3       |
| ZT0048 | Y              | N              | ND                  | 8.0  | -17.5              | 2.6             | -15.2              | -2.3               | 0.3  | 30.2       |
| ZT0049 | N              | N              | ND                  | 8.0  | -16.5              | 2.3             | -23.0              | 6.4                | -0.8 | 27.5       |
| ZT0050 | N              | N              | ND                  | 8.0  | -33.3              | 3.0             | -25.3              | -8.1               | 1.0  | 24.7       |
| ZT0007 | Y              | Y              | Y                   | 10.0 | -26.7              | 3.6             | -14.8              | -11.9              | 1.2  | 26.1       |
| ZT0056 | N              | N              | ND                  | 8.0  | -18.8              | 2.6             | -18.3              | -0.5               | 0.1  | 24.9       |
| ZT0057 | N              | N              | ND                  | 8.0  | -22.3              | 2.5             | -27.5              | 5.1                | -0.6 | 25.3       |
| ZT0068 | N              | Y              | ND                  | 12.0 | -27.3              | 3.6             | -17.8              | -9.5               | 0.8  | 30.3       |
| ZT0069 | N              | N              | ND                  | 12.0 | -21.5              | 3.3             | -26.2              | 4.7                | -0.4 | 34.6       |
| ZT0071 | N              | N              | ND                  | 13.0 | -22.4              | 3.1             | -22.9              | 0.5                | 0.0  | 38.1       |
| ZT0072 | Y              | N              | N                   | 13.0 | -28.1              | 3.2             | -14.3              | -13.8              | 1.1  | 30.9       |

|        |   |   |    |      |       |     |       |       |      |      |
|--------|---|---|----|------|-------|-----|-------|-------|------|------|
| ZT0082 | Y | Y | Y  | 10.0 | -28.6 | 3.1 | -17.2 | -11.4 | 1.1  | 25.2 |
| ZT0074 | Y | N | ND | 9.0  | -26.4 | 3.1 | -13.2 | -13.2 | 1.5  | 25.5 |
| ZT0075 | N | Y | ND | 10.0 | -21.1 | 2.6 | -15.1 | -6.0  | 0.6  | 34.9 |
| ZT0820 | Y | Y | ND | 15.0 | -29.7 | 3.6 | -15.8 | -14.0 | 0.9  | 34.6 |
| ZT0078 | N | N | ND | 10.0 | -17.2 | 3.0 | -16.8 | -0.4  | 0.0  | 26.5 |
| ZT0784 | Y | Y | ND | 15.0 | -29.1 | 3.5 | -15.1 | -14.0 | 0.9  | 32.2 |
| ZT0470 | Y | Y | N  | 13.0 | -29.0 | 3.2 | -17.3 | -11.7 | 0.9  | 28.1 |
| ZT0818 | Y | Y | N  | 14.0 | -25.8 | 3.1 | -13.3 | -12.5 | 0.9  | 33.6 |
| ZT0083 | N | Y | ND | 12.0 | -21.7 | 2.6 | -18.1 | -3.6  | 0.3  | 30.4 |
| ZT0084 | N | Y | ND | 14.0 | -11.8 | 1.7 | -8.6  | -3.2  | 0.2  | 24.3 |
| ZT0087 | N | N | ND | 11.0 | -23.2 | 3.0 | -20.6 | -2.7  | 0.2  | 26.0 |
| ZT0089 | N | N | ND | 10.0 | -13.6 | 2.0 | -17.5 | 3.9   | -0.4 | 24.6 |
| ZT0090 | N | N | ND | 11.0 | -21.7 | 2.8 | -26.2 | 4.5   | -0.4 | 24.1 |
| ZT0022 | Y | Y | Y  | 11.0 | -23.5 | 2.6 | -13.8 | -9.6  | 0.9  | 28.8 |
| ZT0563 | Y | Y | N  | 9.0  | -25.0 | 3.1 | -17.7 | -7.4  | 0.8  | 28.1 |
| ZT0794 | Y | Y | N  | 11.0 | -20.5 | 2.6 | -11.5 | -9.0  | 0.8  | 29.8 |
| ZT0091 | Y | Y | N  | 12.0 | -25.6 | 3.0 | -16.0 | -9.6  | 0.8  | 32.7 |
| ZT0748 | Y | Y | ND | 10.0 | -24.7 | 2.5 | -17.1 | -7.6  | 0.8  | 30.4 |
| ZT0199 | Y | Y | ND | 12.0 | -26.3 | 3.2 | -17.2 | -9.1  | 0.8  | 27.8 |
| ZT0789 | Y | Y | ND | 13.0 | -26.6 | 2.8 | -16.8 | -9.8  | 0.8  | 23.4 |
| ZT0102 | N | Y | ND | 11.0 | -10.2 | 1.7 | -15.8 | 5.6   | -0.5 | 27.5 |
| ZT0103 | Y | N | N  | 11.0 | -14.4 | 2.0 | -14.6 | 0.3   | 0.0  | 29.0 |
| ZT0817 | Y | Y | ND | 14.0 | -25.8 | 3.1 | -15.8 | -10.0 | 0.7  | 30.6 |
| ZT0447 | Y | Y | N  | 12.0 | -23.9 | 3.0 | -15.5 | -8.4  | 0.7  | 38.2 |
| ZT0110 | Y | N | ND | 11.0 | -19.6 | 2.5 | -18.0 | -1.6  | 0.1  | 29.1 |
| ZT0119 | N | N | ND | 13.0 | -19.8 | 2.5 | -20.3 | 0.5   | 0.0  | 33.2 |
| ZT0125 | N | N | ND | 10.0 | -16.2 | 2.3 | -15.9 | -0.3  | 0.0  | 26.8 |
| ZT0126 | Y | N | ND | 10.0 | -20.2 | 2.8 | -12.8 | -7.4  | 0.7  | 25.3 |
| ZT0131 | N | N | ND | 7.0  | -26.5 | 3.3 | -25.1 | -1.4  | 0.2  | 22.6 |
| ZT0280 | Y | Y | ND | 11.0 | -20.2 | 2.8 | -12.7 | -7.5  | 0.7  | 30.9 |
| ZT0173 | N | N | ND | 8.0  | -17.8 | 2.3 | -18.6 | 0.8   | -0.1 | 24.4 |
| ZT0184 | N | N | ND | 6.0  | -14.1 | 1.8 | -12.9 | -1.2  | 0.2  | 24.3 |
| ZT0191 | N | N | ND | 9.0  | -13.9 | 1.9 | -14.7 | 0.8   | -0.1 | 26.0 |
| ZT0196 | N | N | ND | 13.0 | -17.6 | 2.4 | -18.0 | 0.4   | 0.0  | 23.7 |
| ZT0426 | Y | Y | ND | 10.0 | -20.4 | 3.0 | -13.8 | -6.7  | 0.7  | 25.3 |
| ZT0431 | Y | Y | N  | 9.0  | -20.2 | 2.8 | -14.4 | -5.8  | 0.6  | 26.3 |
| ZT0834 | Y | Y | ND | 15.0 | -29.1 | 3.3 | -20.0 | -9.2  | 0.6  | 29.9 |
| ZT0759 | Y | Y | N  | 10.0 | -23.2 | 2.8 | -17.1 | -6.0  | 0.6  | 27.6 |
| ZT0206 | N | N | ND | 12.0 | -13.1 | 1.6 | -21.4 | 8.3   | -0.7 | 29.2 |
| ZT0209 | N | N | ND | 10.0 | -7.8  | 1.3 | -9.5  | 1.7   | -0.2 | 25.7 |
| ZT0212 | N | N | ND | 7.0  | -29.3 | 3.4 | -22.4 | -6.9  | 1.0  | 20.4 |
| ZT0772 | Y | Y | ND | 10.0 | -20.7 | 2.6 | -14.9 | -5.9  | 0.6  | 29.1 |
| ZT0215 | N | N | ND | 11.0 | -20.4 | 2.6 | -24.1 | 3.7   | -0.3 | 28.9 |
| ZT0200 | Y | Y | ND | 12.0 | -21.0 | 3.1 | -14.4 | -6.6  | 0.6  | 27.8 |
| ZT0218 | N | N | ND | 12.0 | -18.4 | 2.3 | -21.8 | 3.4   | -0.3 | 33.5 |
| ZT0219 | N | Y | ND | 10.0 | -23.8 | 2.9 | -15.7 | -8.1  | 0.8  | 30.6 |
| ZT0220 | N | N | ND | 9.0  | -18.9 | 2.0 | -18.8 | -0.1  | 0.0  | 30.9 |
| ZT0244 | N | N | ND | 11.0 | -17.3 | 2.4 | -20.3 | 3.0   | -0.3 | 27.0 |

|        |   |   |    |      |       |     |       |       |      |      |
|--------|---|---|----|------|-------|-----|-------|-------|------|------|
| ZT0246 | Y | N | ND | 12.0 | -21.3 | 3.1 | -14.7 | -6.6  | 0.6  | 28.8 |
| ZT0247 | N | N | ND | 12.0 | -16.2 | 2.3 | -13.9 | -2.3  | 0.2  | 28.1 |
| ZT0109 | Y | Y | N  | 11.0 | -20.2 | 2.8 | -14.1 | -6.1  | 0.6  | 29.1 |
| ZT0250 | N | Y | ND | 12.0 | -18.4 | 2.3 | -19.3 | 0.9   | -0.1 | 29.1 |
| ZT0252 | Y | N | ND | 11.0 | -21.2 | 2.5 | -16.2 | -5.0  | 0.5  | 26.8 |
| ZT0256 | N | N | ND | 14.0 | -16.2 | 1.8 | -17.5 | 1.3   | -0.1 | 31.2 |
| ZT0623 | Y | Y | ND | 10.0 | -16.3 | 2.0 | -10.9 | -5.4  | 0.5  | 28.1 |
| ZT0260 | Y | N | ND | 12.0 | -19.8 | 2.5 | -21.2 | 1.4   | -0.1 | 27.4 |
| ZT0261 | Y | N | ND | 12.0 | -13.6 | 2.0 | -11.0 | -2.6  | 0.2  | 25.9 |
| ZT0262 | N | N | ND | 12.0 | -34.3 | 4.1 | -16.5 | -17.8 | 1.5  | 29.7 |
| ZT0428 | Y | Y | N  | 11.0 | -21.7 | 2.8 | -16.2 | -5.5  | 0.5  | 26.2 |
| ZT0303 | Y | Y | ND | 12.0 | -20.7 | 2.5 | -15.3 | -5.4  | 0.4  | 31.4 |
| ZT0101 | Y | Y | Y  | 12.0 | -20.4 | 2.6 | -15.2 | -5.3  | 0.4  | 31.9 |
| ZT0268 | Y | N | ND | 13.0 | -23.5 | 3.0 | -2.2  | -21.4 | 1.6  | 31.1 |
| ZT0265 | Y | Y | Y  | 13.0 | -22.0 | 2.8 | -16.4 | -5.6  | 0.4  | 31.6 |
| ZT0270 | N | N | ND | 14.0 | -29.7 | 3.6 | -21.5 | -8.2  | 0.6  | 30.4 |
| ZT0271 | N | Y | ND | 16.0 | -30.9 | 3.7 | -29.5 | -1.4  | 0.1  | 39.0 |
| ZT0272 | Y | N | ND | 16.0 | -17.4 | 2.3 | -21.0 | 3.7   | -0.2 | 28.1 |
| ZT0448 | Y | Y | N  | 12.0 | -21.9 | 2.8 | -17.0 | -4.9  | 0.4  | 28.3 |
| ZT0274 | N | N | ND | 10.0 | -25.5 | 3.1 | -22.4 | -3.1  | 0.3  | 32.8 |
| ZT0275 | N | N | ND | 11.0 | -24.7 | 3.0 | -20.7 | -4.0  | 0.4  | 37.1 |
| ZT0278 | N | N | ND | 11.0 | -13.6 | 2.0 | -12.1 | -1.5  | 0.1  | 31.5 |
| ZT0279 | Y | N | ND | 11.0 | -13.0 | 2.1 | -6.1  | -6.9  | 0.6  | 33.5 |
| ZT0761 | Y | Y | N  | 11.0 | -17.1 | 2.4 | -12.5 | -4.5  | 0.4  | 28.5 |
| ZT0281 | Y | N | ND | 13.0 | -13.9 | 2.0 | -16.0 | 2.1   | -0.2 | 32.3 |
| ZT0266 | Y | Y | N  | 13.0 | -18.0 | 2.5 | -12.6 | -5.4  | 0.4  | 29.5 |
| ZT0287 | Y | N | ND | 10.0 | -15.6 | 2.2 | -18.2 | 2.6   | -0.3 | 27.1 |
| ZT0289 | N | N | ND | 10.0 | -15.1 | 2.3 | -14.5 | -0.5  | 0.1  | 27.8 |
| ZT0290 | N | Y | ND | 10.0 | -16.5 | 2.1 | -21.0 | 4.4   | -0.4 | 28.8 |
| ZT0292 | N | Y | ND | 10.0 | -16.7 | 2.0 | -18.4 | 1.6   | -0.2 | 28.5 |
| ZT0296 | N | N | ND | 10.0 | -19.2 | 2.2 | -21.1 | 2.0   | -0.2 | 28.0 |
| ZT0269 | Y | Y | N  | 12.0 | -16.5 | 2.0 | -11.6 | -4.9  | 0.4  | 26.3 |
| ZT0305 | N | N | ND | 8.0  | -20.3 | 2.8 | -18.6 | -1.7  | 0.2  | 27.0 |
| ZT0143 | Y | Y | N  | 11.0 | -20.7 | 3.2 | -16.4 | -4.3  | 0.4  | 26.4 |
| ZT0312 | N | N | ND | 8.0  | -12.9 | 2.0 | -14.7 | 1.8   | -0.2 | 21.8 |
| ZT0313 | Y | N | ND | 9.0  | -15.6 | 1.9 | -14.9 | -0.7  | 0.1  | 27.7 |
| ZT0316 | N | N | ND | 9.0  | -18.1 | 2.2 | -22.5 | 4.4   | -0.5 | 27.7 |
| ZT0320 | Y | N | ND | 10.0 | -17.5 | 1.8 | -21.3 | 3.7   | -0.4 | 28.2 |
| ZT0326 | N | Y | ND | 10.0 | -18.6 | 1.9 | -21.0 | 2.4   | -0.2 | 29.4 |
| ZT0327 | N | Y | ND | 10.0 | -23.1 | 2.6 | -26.4 | 3.3   | -0.3 | 29.5 |
| ZT0328 | N | N | ND | 10.0 | -17.6 | 2.4 | -20.7 | 3.2   | -0.3 | 32.3 |
| ZT0329 | Y | N | ND | 10.0 | -14.6 | 2.0 | -18.4 | 3.8   | -0.4 | 26.3 |
| ZT0100 | Y | Y | N  | 12.0 | -24.2 | 3.0 | -19.6 | -4.6  | 0.4  | 33.0 |
| ZT0336 | N | N | ND | 9.0  | -19.3 | 2.3 | -17.5 | -1.8  | 0.2  | 23.8 |
| ZT0356 | N | N | ND | 8.0  | -8.9  | 1.5 | -9.4  | 0.5   | -0.1 | 25.7 |
| ZT0357 | N | N | ND | 8.0  | -16.3 | 2.3 | -18.9 | 2.7   | -0.3 | 24.8 |
| ZT0358 | N | N | ND | 8.0  | -13.7 | 2.0 | -13.8 | 0.1   | 0.0  | 24.1 |
| ZT0370 | Y | N | ND | 8.0  | -16.4 | 2.1 | -18.4 | 2.0   | -0.2 | 24.5 |

|        |   |   |    |      |       |     |       |       |      |      |
|--------|---|---|----|------|-------|-----|-------|-------|------|------|
| ZT0371 | N | N | ND | 9.0  | -32.6 | 3.7 | -31.9 | -0.8  | 0.1  | 29.2 |
| ZT0372 | N | N | ND | 9.0  | -16.7 | 2.2 | -14.4 | -2.3  | 0.3  | 26.7 |
| ZT0373 | N | N | ND | 8.0  | -8.2  | 1.3 | -14.9 | 6.7   | -0.8 | 23.6 |
| ZT0380 | N | N | ND | 9.0  | -7.8  | 1.3 | -11.1 | 3.3   | -0.4 | 29.7 |
| ZT0764 | Y | Y | N  | 11.0 | -16.5 | 2.3 | -12.3 | -4.2  | 0.4  | 26.1 |
| ZT0389 | N | N | ND | 9.0  | -20.8 | 3.1 | -21.4 | 0.6   | -0.1 | 26.4 |
| ZT0391 | N | N | ND | 9.0  | -17.8 | 2.5 | -18.4 | 0.5   | -0.1 | 26.9 |
| ZT0782 | Y | Y | N  | 13.0 | -22.6 | 2.8 | -17.7 | -4.9  | 0.4  | 27.9 |
| ZT0394 | N | Y | ND | 9.0  | -17.3 | 2.2 | -21.9 | 4.6   | -0.5 | 29.4 |
| ZT0395 | N | N | ND | 9.0  | -15.2 | 2.1 | -18.0 | 2.8   | -0.3 | 27.8 |
| ZT0396 | N | N | ND | 9.0  | -20.2 | 2.7 | -19.1 | -1.1  | 0.1  | 28.1 |
| ZT0080 | Y | Y | ND | 11.0 | -21.1 | 2.8 | -17.0 | -4.1  | 0.4  | 29.3 |
| ZT0399 | N | Y | ND | 9.0  | -25.3 | 3.1 | -18.8 | -6.5  | 0.7  | 27.8 |
| ZT0400 | N | Y | ND | 9.0  | -17.8 | 2.3 | -16.3 | -1.5  | 0.2  | 29.7 |
| ZT0401 | N | Y | ND | 9.0  | -18.3 | 2.5 | -17.5 | -0.8  | 0.1  | 29.0 |
| ZT0402 | Y | N | Y  | 9.0  | -23.8 | 3.0 | -10.9 | -12.9 | 1.4  | 27.4 |
| ZT0791 | Y | Y | ND | 14.0 | -18.7 | 2.4 | -13.5 | -5.2  | 0.4  | 28.8 |
| ZT0404 | Y | N | ND | 9.0  | -17.5 | 3.5 | -12.3 | -5.2  | 0.6  | 30.6 |
| ZT0405 | Y | N | ND | 9.0  | -22.7 | 3.0 | -21.8 | -0.9  | 0.1  | 30.0 |
| ZT0097 | Y | Y | Y  | 12.0 | -23.8 | 2.5 | -19.4 | -4.3  | 0.4  | 32.7 |
| ZT0407 | N | N | ND | 9.0  | -13.0 | 1.8 | -11.6 | -1.4  | 0.2  | 29.6 |
| ZT0408 | N | Y | ND | 9.0  | -15.9 | 2.1 | -15.6 | -0.3  | 0.0  | 30.6 |
| ZT0409 | Y | N | ND | 9.0  | -18.1 | 2.4 | -17.9 | -0.2  | 0.0  | 31.5 |
| ZT0410 | N | Y | ND | 9.0  | -16.1 | 2.1 | -17.7 | 1.5   | -0.2 | 31.2 |
| ZT0411 | N | N | ND | 10.0 | -29.2 | 3.5 | -26.7 | -2.5  | 0.2  | 29.5 |
| ZT0412 | N | N | ND | 10.0 | -26.7 | 3.1 | -18.3 | -8.4  | 0.8  | 29.9 |
| ZT0413 | N | N | ND | 10.0 | -9.9  | 1.5 | -16.0 | 6.1   | -0.6 | 27.6 |
| ZT0414 | N | N | ND | 10.0 | -22.9 | 2.8 | -23.0 | 0.1   | 0.0  | 23.9 |
| ZT0415 | N | N | ND | 11.0 | -12.6 | 1.8 | -16.6 | 4.0   | -0.4 | 27.1 |
| ZT0417 | Y | N | ND | 11.0 | -23.5 | 3.0 | -17.3 | -6.2  | 0.6  | 27.0 |
| ZT0418 | N | N | ND | 11.0 | -15.4 | 2.1 | -18.8 | 3.4   | -0.3 | 25.6 |
| ZT0419 | N | N | ND | 11.0 | -11.1 | 1.7 | -10.9 | -0.2  | 0.0  | 33.6 |
| ZT0421 | N | N | ND | 10.0 | -13.5 | 2.1 | -16.5 | 3.1   | -0.3 | 31.7 |
| ZT0422 | N | N | ND | 10.0 | -22.1 | 2.8 | -20.9 | -1.2  | 0.1  | 26.8 |
| ZT0424 | N | N | ND | 8.0  | -23.2 | 2.5 | -23.4 | 0.2   | 0.0  | 22.5 |
| ZT0308 | Y | Y | Y  | 11.0 | -22.6 | 2.5 | -18.7 | -3.9  | 0.4  | 30.0 |
| ZT0452 | Y | Y | ND | 13.0 | -16.8 | 2.0 | -12.4 | -4.5  | 0.3  | 32.2 |
| ZT0427 | Y | N | ND | 10.0 | -13.4 | 1.9 | -12.8 | -0.6  | 0.1  | 25.9 |
| ZT0106 | Y | Y | N  | 11.0 | -22.5 | 2.8 | -18.9 | -3.6  | 0.3  | 30.3 |
| ZT0429 | Y | N | N  | 11.0 | -18.0 | 2.4 | -19.3 | 1.3   | -0.1 | 27.7 |
| ZT0430 | Y | N | ND | 9.0  | -19.9 | 2.4 | -18.1 | -1.8  | 0.2  | 25.8 |
| ZT0096 | Y | Y | ND | 12.0 | -24.0 | 2.8 | -20.2 | -3.8  | 0.3  | 33.2 |
| ZT0045 | Y | Y | ND | 8.0  | -18.9 | 2.5 | -16.4 | -2.5  | 0.3  | 34.7 |
| ZT0434 | N | N | ND | 9.0  | -18.8 | 2.4 | -15.8 | -3.0  | 0.3  | 25.8 |
| ZT0435 | N | N | ND | 9.0  | -13.9 | 1.8 | -17.9 | 4.0   | -0.4 | 25.3 |
| ZT0437 | N | N | ND | 9.0  | -21.8 | 2.5 | -20.2 | -1.6  | 0.2  | 24.6 |
| ZT0438 | N | N | ND | 9.0  | -12.4 | 1.7 | -17.3 | 4.8   | -0.5 | 24.1 |
| ZT0439 | N | N | ND | 9.0  | -24.8 | 2.7 | -23.4 | -1.5  | 0.2  | 22.7 |

|        |   |   |    |      |       |     |       |       |      |      |
|--------|---|---|----|------|-------|-----|-------|-------|------|------|
| ZT0440 | N | N | ND | 9.0  | -15.4 | 2.1 | -13.2 | -2.2  | 0.2  | 28.5 |
| ZT0441 | N | N | ND | 9.0  | -14.9 | 2.0 | -12.9 | -2.0  | 0.2  | 25.2 |
| ZT0442 | N | N | ND | 9.0  | -14.8 | 1.9 | -12.5 | -2.3  | 0.3  | 29.3 |
| ZT0443 | Y | N | ND | 9.0  | -23.7 | 2.7 | -22.4 | -1.3  | 0.1  | 22.9 |
| ZT0773 | Y | Y | ND | 11.0 | -27.7 | 3.2 | -24.3 | -3.3  | 0.3  | 28.8 |
| ZT0717 | Y | Y | ND | 11.0 | -16.2 | 2.1 | -13.0 | -3.3  | 0.3  | 28.1 |
| ZT0249 | Y | Y | N  | 11.0 | -19.1 | 1.8 | -15.9 | -3.2  | 0.3  | 27.6 |
| ZT0432 | Y | Y | ND | 9.0  | -19.1 | 2.1 | -16.5 | -2.5  | 0.3  | 25.7 |
| ZT0762 | Y | Y | N  | 11.0 | -15.4 | 2.1 | -12.4 | -3.0  | 0.3  | 29.9 |
| ZT0026 | Y | Y | ND | 8.0  | -16.2 | 2.2 | -14.2 | -2.0  | 0.2  | 28.0 |
| ZT0740 | Y | Y | ND | 13.0 | -26.7 | 3.3 | -23.5 | -3.1  | 0.2  | 31.5 |
| ZT0449 | Y | Y | ND | 12.0 | -22.0 | 2.8 | -19.3 | -2.7  | 0.2  | 30.2 |
| ZT0462 | N | N | ND | 12.0 | -12.7 | 1.8 | -14.6 | 1.9   | -0.2 | 27.7 |
| ZT0463 | Y | N | Y  | 12.0 | -21.4 | 3.0 | -20.6 | -0.8  | 0.1  | 27.9 |
| ZT0019 | Y | Y | N  | 10.0 | -19.2 | 2.4 | -17.0 | -2.2  | 0.2  | 28.5 |
| ZT0465 | N | N | ND | 13.0 | -14.8 | 2.0 | -16.6 | 1.8   | -0.1 | 30.9 |
| ZT0468 | N | N | ND | 13.0 | -29.2 | 3.6 | -29.3 | 0.1   | 0.0  | 32.3 |
| ZT0282 | Y | Y | ND | 14.0 | -20.4 | 2.6 | -17.4 | -3.0  | 0.2  | 34.1 |
| ZT0478 | N | N | ND | 9.0  | -18.3 | 2.4 | -16.2 | -2.1  | 0.2  | 26.0 |
| ZT0529 | N | N | ND | 10.0 | -19.7 | 2.8 | -13.5 | -6.2  | 0.6  | 32.9 |
| ZT0530 | Y | N | ND | 10.0 | -13.8 | 2.0 | -15.4 | 1.6   | -0.2 | 32.1 |
| ZT0425 | Y | Y | ND | 9.0  | -18.0 | 2.1 | -16.1 | -1.9  | 0.2  | 31.2 |
| ZT0537 | N | N | ND | 11.0 | -22.6 | 2.5 | -26.9 | 4.3   | -0.4 | 31.3 |
| ZT0543 | Y | N | ND | 10.0 | -42.1 | 4.8 | -19.8 | -22.4 | 2.2  | 31.4 |
| ZT0545 | N | N | ND | 11.0 | -19.8 | 2.5 | -21.1 | 1.3   | -0.1 | 36.8 |
| ZT0546 | N | N | ND | 11.0 | -20.7 | 3.0 | -20.6 | -0.2  | 0.0  | 28.9 |
| ZT0547 | N | N | ND | 11.0 | -19.1 | 2.1 | -0.5  | -18.6 | 1.7  | 37.3 |
| ZT0550 | N | N | ND | 12.0 | -15.1 | 2.1 | -20.3 | 5.2   | -0.4 | 34.3 |
| ZT0557 | N | N | ND | 10.0 | -22.9 | 2.8 | -20.1 | -2.8  | 0.3  | 30.9 |
| ZT0807 | Y | Y | ND | 14.0 | -23.2 | 3.0 | -20.2 | -2.9  | 0.2  | 28.8 |
| ZT0580 | Y | N | Y  | 11.0 | -28.1 | 3.2 | -14.4 | -13.7 | 1.2  | 34.5 |
| ZT0581 | N | Y | ND | 12.0 | -31.7 | 3.5 | -20.3 | -11.4 | 1.0  | 36.4 |
| ZT0582 | N | N | ND | 13.0 | -14.8 | 2.0 | -16.5 | 1.8   | -0.1 | 34.7 |
| ZT0583 | N | N | ND | 13.0 | -16.5 | 2.1 | -14.5 | -1.9  | 0.1  | 36.4 |
| ZT0446 | Y | Y | Y  | 13.0 | -20.7 | 2.6 | -18.1 | -2.6  | 0.2  | 30.0 |
| ZT0403 | Y | Y | ND | 9.0  | -16.5 | 1.8 | -14.7 | -1.8  | 0.2  | 29.2 |
| ZT0587 | Y | N | Y  | 11.0 | -33.1 | 3.5 | -14.5 | -18.5 | 1.7  | 33.2 |
| ZT0588 | N | N | ND | 12.0 | -20.3 | 2.5 | -32.6 | 12.3  | -1.0 | 32.0 |
| ZT0267 | Y | Y | N  | 13.0 | -13.3 | 1.8 | -10.7 | -2.6  | 0.2  | 30.4 |
| ZT0591 | N | N | ND | 12.0 | -19.5 | 2.4 | -18.8 | -0.7  | 0.1  | 33.8 |
| ZT0592 | Y | N | N  | 12.0 | -11.7 | 1.8 | -17.8 | 6.2   | -0.5 | 27.4 |
| ZT0596 | N | N | ND | 9.0  | -17.8 | 2.3 | -18.4 | 0.6   | -0.1 | 24.9 |
| ZT0600 | N | N | ND | 11.0 | -14.4 | 2.0 | -14.6 | 0.2   | 0.0  | 26.0 |
| ZT0601 | N | N | ND | 11.0 | -15.7 | 2.1 | -13.5 | -2.3  | 0.2  | 25.1 |
| ZT0602 | N | N | ND | 11.0 | -17.0 | 1.8 | -16.6 | -0.5  | 0.0  | 25.6 |
| ZT0604 | N | N | ND | 11.0 | -15.3 | 1.8 | -17.0 | 1.7   | -0.2 | 31.1 |
| ZT0605 | N | N | ND | 12.0 | -17.2 | 2.2 | -17.3 | 0.1   | 0.0  | 29.8 |
| ZT0609 | N | N | ND | 11.0 | -12.5 | 1.5 | -14.7 | 2.2   | -0.2 | 27.3 |

|        |   |   |    |      |       |     |       |       |      |      |
|--------|---|---|----|------|-------|-----|-------|-------|------|------|
| ZT0614 | N | N | ND | 11.0 | -18.7 | 2.1 | -14.0 | -4.8  | 0.4  | 29.8 |
| ZT0615 | N | N | ND | 11.0 | -17.3 | 2.4 | -14.7 | -2.6  | 0.2  | 28.3 |
| ZT0621 | N | N | ND | 14.0 | -13.3 | 2.1 | -10.5 | -2.8  | 0.2  | 36.2 |
| ZT0622 | Y | N | ND | 9.0  | -14.9 | 2.5 | -14.9 | 0.0   | 0.0  | 28.5 |
| ZT0273 | Y | Y | N  | 16.0 | -19.7 | 2.6 | -16.6 | -3.1  | 0.2  | 30.5 |
| ZT0625 | N | N | ND | 10.0 | -13.5 | 2.0 | -20.8 | 7.3   | -0.7 | 29.2 |
| ZT0626 | N | N | ND | 10.0 | -17.9 | 2.3 | -15.9 | -1.9  | 0.2  | 29.9 |
| ZT0627 | N | N | ND | 10.0 | -7.0  | 1.1 | -13.9 | 7.0   | -0.7 | 29.6 |
| ZT0628 | Y | N | ND | 11.0 | -17.1 | 2.3 | -23.5 | 6.4   | -0.6 | 27.9 |
| ZT0629 | N | N | ND | 12.0 | -24.3 | 3.1 | -21.0 | -3.3  | 0.3  | 31.1 |
| ZT0630 | N | N | ND | 11.0 | -6.1  | 1.2 | -18.6 | 12.5  | -1.1 | 33.3 |
| ZT0633 | N | N | ND | 12.0 | -26.2 | 3.1 | -25.9 | -0.3  | 0.0  | 36.0 |
| ZT0634 | Y | N | N  | 13.0 | -21.7 | 2.8 | -18.4 | -3.3  | 0.3  | 32.0 |
| ZT0635 | N | N | ND | 13.0 | -25.7 | 3.1 | -24.8 | -0.9  | 0.1  | 35.8 |
| ZT0642 | N | Y | ND | 10.0 | -29.5 | 3.8 | -19.5 | -10.0 | 1.0  | 31.5 |
| ZT0647 | N | N | ND | 11.0 | -17.3 | 2.3 | -17.5 | 0.2   | 0.0  | 35.5 |
| ZT0652 | N | Y | ND | 12.0 | -18.0 | 2.4 | -21.6 | 3.6   | -0.3 | 35.1 |
| ZT0669 | N | N | ND | 10.0 | -11.4 | 1.8 | -19.8 | 8.5   | -0.8 | 24.8 |
| ZT0675 | N | N | ND | 12.0 | -10.4 | 1.6 | -9.7  | -0.7  | 0.1  | 34.6 |
| ZT0676 | N | N | ND | 13.0 | -15.6 | 2.3 | -10.9 | -4.7  | 0.4  | 34.4 |
| ZT0680 | N | N | ND | 14.0 | -29.9 | 3.5 | -29.4 | -0.5  | 0.0  | 26.9 |
| ZT0686 | Y | N | ND | 11.0 | -19.6 | 2.5 | -13.8 | -5.8  | 0.5  | 25.3 |
| ZT0687 | Y | N | ND | 11.0 | -27.1 | 3.3 | -15.2 | -11.9 | 1.1  | 30.7 |
| ZT0688 | N | N | ND | 11.0 | -16.6 | 2.2 | -15.7 | -0.9  | 0.1  | 32.4 |
| ZT0689 | N | Y | ND | 11.0 | -19.3 | 2.3 | -15.8 | -3.5  | 0.3  | 29.1 |
| ZT0690 | N | N | ND | 11.0 | -12.3 | 1.7 | -22.4 | 10.1  | -0.9 | 32.0 |
| ZT0445 | Y | Y | ND | 12.0 | -21.3 | 3.5 | -19.0 | -2.3  | 0.2  | 28.5 |
| ZT0692 | N | N | ND | 11.0 | -9.9  | 1.3 | -11.4 | 1.5   | -0.1 | 29.0 |
| ZT0693 | N | N | ND | 12.0 | -32.8 | 3.5 | -26.9 | -5.9  | 0.5  | 26.1 |
| ZT0694 | N | N | ND | 12.0 | -25.4 | 3.0 | -21.8 | -3.7  | 0.3  | 32.8 |
| ZT0695 | N | N | ND | 12.0 | -16.4 | 2.1 | -28.6 | 12.2  | -1.0 | 31.7 |
| ZT0696 | N | N | ND | 11.0 | -17.9 | 2.3 | -18.3 | 0.4   | 0.0  | 28.6 |
| ZT0698 | Y | N | ND | 13.0 | -34.2 | 3.6 | -18.0 | -16.3 | 1.3  | 28.8 |
| ZT0699 | Y | N | N  | 13.0 | -25.6 | 3.0 | -22.7 | -2.9  | 0.2  | 27.0 |
| ZT0701 | Y | N | Y  | 10.0 | -26.8 | 3.1 | -12.0 | -14.8 | 1.5  | 26.4 |
| ZT0795 | Y | Y | ND | 11.0 | -19.1 | 2.5 | -17.1 | -2.1  | 0.2  | 31.2 |
| ZT0703 | Y | N | N  | 11.0 | -20.7 | 2.6 | -18.9 | -1.9  | 0.2  | 27.0 |
| ZT0705 | N | N | ND | 12.0 | -18.8 | 2.4 | -10.2 | -8.5  | 0.7  | 32.3 |
| ZT0707 | N | N | ND | 13.0 | -12.2 | 1.8 | -15.1 | 3.0   | -0.2 | 19.9 |
| ZT0708 | N | N | ND | 14.0 | -9.4  | 1.5 | -16.0 | 6.5   | -0.5 | 19.2 |
| ZT0709 | Y | N | ND | 14.0 | -14.9 | 2.0 | -17.5 | 2.5   | -0.2 | 21.9 |
| ZT0716 | Y | N | ND | 12.0 | -29.3 | 3.6 | -29.3 | 0.0   | 0.0  | 30.8 |
| ZT0214 | Y | Y | ND | 11.0 | -18.6 | 2.4 | -16.7 | -1.9  | 0.2  | 29.4 |
| ZT0718 | N | N | ND | 12.0 | -11.4 | 1.7 | -25.3 | 13.9  | -1.2 | 32.9 |
| ZT0723 | N | N | ND | 10.0 | -23.9 | 3.5 | -15.6 | -8.3  | 0.8  | 30.1 |
| ZT0724 | N | N | ND | 11.0 | -20.4 | 2.6 | -14.9 | -5.5  | 0.5  | 33.5 |
| ZT0725 | N | Y | ND | 12.0 | -13.1 | 2.1 | -15.7 | 2.5   | -0.2 | 27.1 |
| ZT0726 | N | Y | ND | 13.0 | -20.0 | 3.0 | -23.3 | 3.3   | -0.3 | 30.2 |



|        |   |   |    |      |       |     |       |       |      |      |
|--------|---|---|----|------|-------|-----|-------|-------|------|------|
| ZT0729 | N | N | ND | 10.0 | -19.4 | 3.0 | -13.9 | -5.5  | 0.6  | 30.3 |
| ZT0730 | Y | N | ND | 11.0 | -31.1 | 3.8 | -15.7 | -15.4 | 1.4  | 31.6 |
| ZT0731 | N | N | ND | 11.0 | -10.7 | 1.7 | -17.9 | 7.2   | -0.7 | 30.5 |
| ZT0732 | Y | N | ND | 11.0 | -16.0 | 2.2 | -19.4 | 3.4   | -0.3 | 31.3 |
| ZT0733 | Y | N | ND | 11.0 | -46.3 | 5.1 | -18.3 | -28.0 | 2.5  | 31.3 |
| ZT0738 | N | N | ND | 11.0 | -16.5 | 2.1 | -19.7 | 3.2   | -0.3 | 28.9 |
| ZT0739 | N | N | ND | 11.0 | -17.6 | 2.6 | -16.5 | -1.1  | 0.1  | 28.7 |
| ZT0819 | Y | Y | N  | 14.0 | -19.3 | 3.0 | -16.9 | -2.4  | 0.2  | 32.8 |
| ZT0742 | N | N | ND | 11.0 | -20.7 | 3.0 | -15.1 | -5.6  | 0.5  | 30.6 |
| ZT0744 | N | N | ND | 9.0  | -20.2 | 2.5 | -18.8 | -1.3  | 0.1  | 29.0 |
| ZT0745 | N | N | ND | 10.0 | -15.3 | 2.1 | -15.3 | 0.0   | 0.0  | 27.5 |
| ZT0746 | N | N | ND | 10.0 | -14.9 | 2.0 | -17.4 | 2.4   | -0.2 | 30.9 |
| ZT0747 | N | N | ND | 11.0 | -26.8 | 3.2 | -25.9 | -0.9  | 0.1  | 29.3 |
| ZT0099 | Y | Y | ND | 12.0 | -23.7 | 2.8 | -21.8 | -1.9  | 0.2  | 32.9 |
| ZT0749 | N | N | ND | 9.0  | -19.5 | 2.8 | -23.3 | 3.7   | -0.4 | 31.6 |
| ZT0750 | Y | N | ND | 10.0 | -26.3 | 3.2 | -24.2 | -2.1  | 0.2  | 31.9 |
| ZT0754 | N | N | ND | 11.0 | -27.3 | 3.3 | -21.8 | -5.5  | 0.5  | 29.8 |
| ZT0585 | Y | Y | Y  | 12.0 | -17.4 | 2.3 | -15.5 | -1.9  | 0.2  | 29.9 |
| ZT0204 | Y | Y | N  | 11.0 | -19.0 | 2.5 | -17.4 | -1.6  | 0.1  | 28.1 |
| ZT0803 | Y | Y | N  | 12.0 | -23.3 | 2.8 | -22.0 | -1.3  | 0.1  | 27.7 |
| ZT0335 | Y | Y | ND | 10.0 | -21.1 | 2.7 | -20.1 | -1.0  | 0.1  | 26.2 |
| ZT0387 | Y | Y | ND | 9.0  | -20.9 | 2.9 | -20.2 | -0.7  | 0.1  | 26.6 |
| ZT0813 | Y | Y | ND | 12.0 | -19.4 | 3.0 | -18.5 | -0.9  | 0.1  | 30.1 |
| ZT0814 | Y | Y | ND | 12.0 | -13.7 | 2.0 | -13.4 | -0.3  | 0.0  | 29.8 |
| ZT0758 | Y | Y | N  | 10.0 | -10.9 | 1.6 | -10.9 | 0.0   | 0.0  | 26.9 |
| ZT0765 | Y | N | N  | 12.0 | -21.8 | 2.8 | -28.2 | 6.4   | -0.5 | 30.0 |
| ZT0079 | Y | Y | N  | 10.0 | -17.9 | 2.4 | -18.0 | 0.1   | 0.0  | 26.3 |
| ZT0769 | Y | N | ND | 11.0 | -24.8 | 3.1 | -22.3 | -2.4  | 0.2  | 35.1 |
| ZT0771 | N | N | ND | 9.0  | -8.7  | 1.5 | -7.4  | -1.3  | 0.1  | 20.4 |
| ZT0398 | Y | Y | ND | 9.0  | -14.8 | 2.1 | -15.3 | 0.5   | -0.1 | 28.3 |
| ZT0093 | Y | Y | N  | 12.0 | -20.4 | 3.0 | -21.1 | 0.7   | -0.1 | 29.0 |
| ZT0801 | Y | Y | ND | 12.0 | -13.4 | 2.1 | -14.2 | 0.8   | -0.1 | 28.5 |
| ZT0535 | Y | Y | ND | 12.0 | -21.0 | 2.6 | -22.0 | 1.0   | -0.1 | 34.7 |
| ZT0584 | Y | Y | N  | 11.0 | -13.4 | 2.0 | -14.5 | 1.1   | -0.1 | 29.5 |
| ZT0786 | N | Y | ND | 12.0 | -11.1 | 1.7 | -14.5 | 3.4   | -0.3 | 32.1 |
| ZT0787 | N | Y | ND | 12.0 | -14.7 | 2.0 | -19.1 | 4.4   | -0.4 | 29.3 |
| ZT0702 | Y | Y | ND | 11.0 | -17.6 | 2.4 | -18.9 | 1.2   | -0.1 | 25.7 |
| ZT0450 | Y | Y | N  | 13.0 | -16.8 | 2.1 | -18.5 | 1.6   | -0.1 | 29.4 |
| ZT0790 | N | Y | ND | 13.0 | -29.4 | 3.5 | -14.6 | -14.8 | 1.1  | 29.7 |
| ZT0406 | Y | Y | ND | 9.0  | -13.1 | 2.1 | -14.6 | 1.5   | -0.2 | 29.4 |
| ZT0792 | N | Y | ND | 11.0 | -22.7 | 2.8 | -20.2 | -2.5  | 0.2  | 28.9 |
| ZT0793 | Y | N | ND | 11.0 | -16.8 | 2.2 | -14.7 | -2.0  | 0.2  | 28.1 |
| ZT0760 | Y | Y | N  | 11.0 | -12.3 | 1.8 | -14.2 | 1.9   | -0.2 | 27.6 |
| ZT0201 | Y | Y | ND | 12.0 | -18.8 | 2.4 | -20.9 | 2.2   | -0.2 | 28.3 |
| ZT0796 | N | Y | ND | 11.0 | -20.2 | 2.8 | -10.0 | -10.1 | 0.9  | 30.8 |
| ZT0259 | Y | Y | N  | 13.0 | -14.9 | 2.1 | -17.3 | 2.4   | -0.2 | 29.0 |
| ZT0802 | Y | N | ND | 12.0 | -16.7 | 2.1 | -21.0 | 4.3   | -0.4 | 29.9 |
| ZT0464 | Y | Y | ND | 13.0 | -17.9 | 2.2 | -20.7 | 2.7   | -0.2 | 28.7 |

|        |   |   |    |      |       |     |       |       |      |      |
|--------|---|---|----|------|-------|-----|-------|-------|------|------|
| ZT0804 | N | N | ND | 13.0 | -32.8 | 3.7 | -30.8 | -2.0  | 0.2  | 31.5 |
| ZT0805 | N | N | ND | 13.0 | -32.7 | 3.8 | -26.0 | -6.7  | 0.5  | 34.0 |
| ZT0077 | Y | Y | ND | 9.0  | -16.1 | 2.1 | -18.2 | 2.1   | -0.2 | 28.1 |
| ZT0808 | N | N | ND | 13.0 | -9.9  | 1.8 | -23.0 | 13.1  | -1.0 | 29.9 |
| ZT0809 | N | Y | ND | 11.0 | -11.9 | 1.8 | -13.3 | 1.4   | -0.1 | 29.1 |
| ZT0812 | N | N | ND | 13.0 | -18.9 | 2.4 | -18.6 | -0.3  | 0.0  | 32.0 |
| ZT0821 | Y | Y | ND | 15.0 | -18.5 | 2.8 | -22.5 | 4.0   | -0.3 | 33.4 |
| ZT0451 | Y | Y | ND | 13.0 | -15.8 | 2.1 | -20.1 | 4.3   | -0.3 | 30.4 |
| ZT0785 | Y | Y | N  | 12.0 | -16.9 | 2.3 | -21.8 | 4.9   | -0.4 | 25.1 |
| ZT0757 | Y | Y | ND | 10.0 | -14.4 | 2.0 | -19.2 | 4.8   | -0.5 | 27.4 |
| ZT0766 | Y | Y | N  | 11.0 | -9.9  | 1.5 | -15.6 | 5.7   | -0.5 | 25.1 |
| ZT0217 | Y | Y | ND | 12.0 | -11.9 | 1.8 | -19.6 | 7.7   | -0.6 | 28.1 |
| ZT0589 | Y | Y | N  | 12.0 | -16.5 | 2.3 | -25.3 | 8.8   | -0.7 | 29.9 |
| ZT0823 | N | Y | ND | 14.0 | -22.7 | 3.1 | -11.4 | -11.3 | 0.8  | 27.8 |
| ZT0825 | N | Y | ND | 13.0 | -21.1 | 2.8 | -10.3 | -10.8 | 0.8  | 23.9 |
| ZT0826 | N | Y | ND | 13.0 | -12.8 | 1.8 | -10.9 | -1.9  | 0.1  | 30.8 |
| ZT0827 | N | Y | ND | 13.0 | -20.6 | 2.8 | -17.3 | -3.3  | 0.3  | 31.9 |
| ZT0832 | N | N | ND | 14.0 | -15.7 | 2.1 | -20.2 | 4.6   | -0.3 | 35.0 |
| ZT0691 | Y | Y | Y  | 11.0 | -14.1 | 2.0 | -25.6 | 11.5  | -1.0 | 32.6 |
| ZT0835 | N | N | ND | 16.0 | -19.7 | 2.3 | -23.5 | 3.8   | -0.2 | 26.7 |
| ZT0848 | N | N | ND | 8.0  | -18.5 | 1.8 | -22.1 | 3.7   | -0.5 | 27.0 |
| ZT0850 | N | N | ND | 8.0  | -13.2 | 1.8 | -20.0 | 6.8   | -0.9 | 35.0 |
| ZT0851 | N | N | ND | 8.0  | -24.9 | 3.1 | -29.8 | 4.8   | -0.6 | 28.0 |
| ZT0852 | N | N | ND | 8.0  | -26.4 | 3.3 | -29.7 | 3.3   | -0.4 | 30.2 |

1 No; <sup>2</sup> Yes; <sup>3</sup> Not determined; <sup>4</sup> Stand deviation of enthalpy (kcal/mol).

## 2. Effect of different entropy calculation methods and solute dielectric constants on enrichment of the subset.

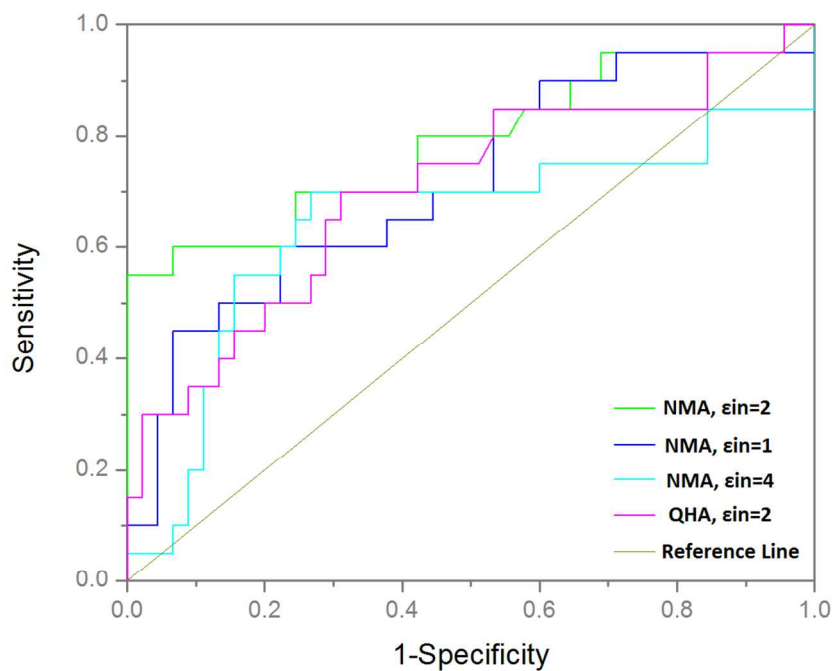

**Figure S1.** Effect of different entropy calculation methods and solute dielectric constants on enrichment of the subset (65 compound subset that has undergone CAIR competition studies). The AU-ROC value for NMA, Normal-mode analysis (AU-ROC: 0.78) was statistically significantly different from QHA, Quasi-harmonic analysis (AU-ROC: 0.70,  $p$ -value: <0.01). The AU-ROC value for  $\epsilon_{in} = 2$  (AU-ROC: 0.78) was statistically significantly different from  $\epsilon_{in} = 1$  (AU-ROC: 0.72,  $p$ -value: 0.01) or  $\epsilon_{in} = 4$  (AU-ROC: 0.64,  $p$ -value: <0.01).

### 3. Effect of MM/PBSA components on enrichment of the subset

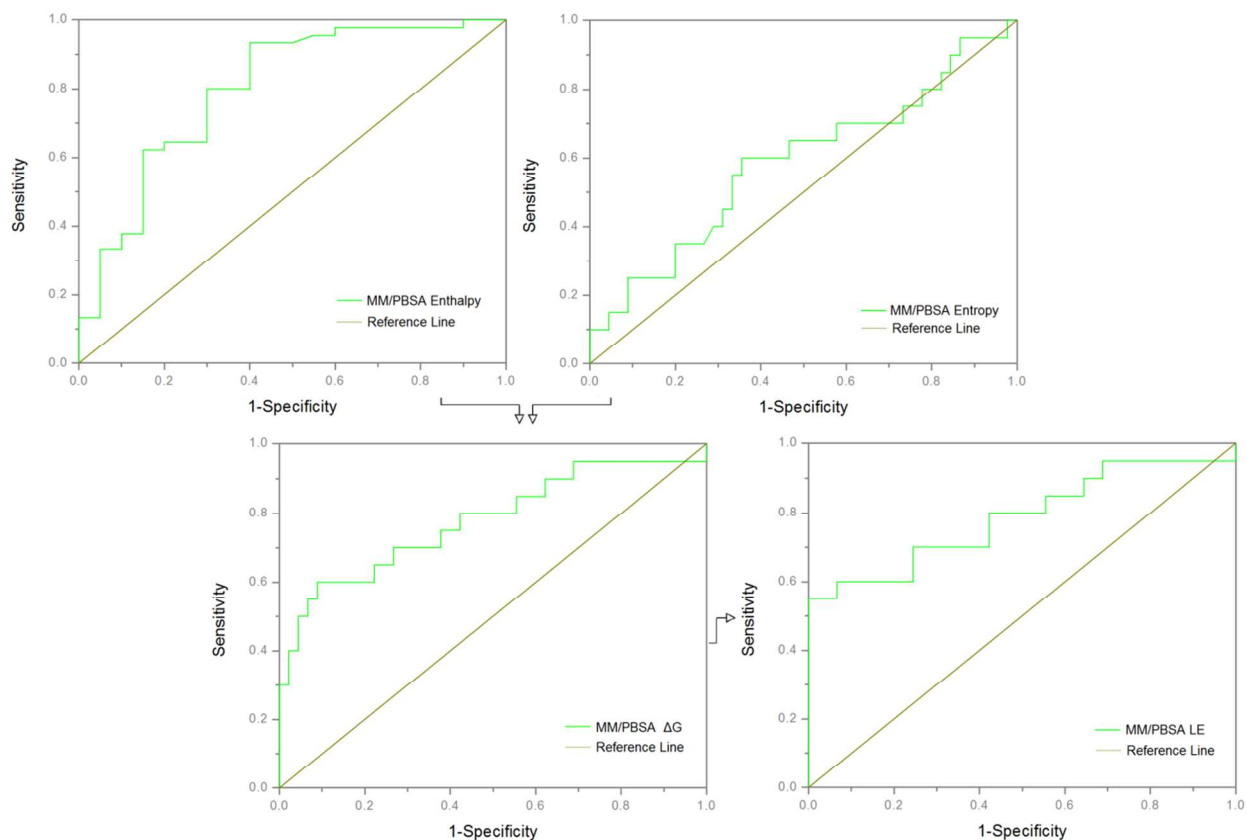

**Figure S2. Effect of MM/PBSA components on enrichment** (a 65 compound subset that has undergone CAIR competition studies). The contribution of enthalpy and entropy to overall binding energy and fragment screening enrichment are shown here using ROC plots: enthalpy AU-ROC 0.76, entropy AU-ROC 0.59, overall 0.79. A noticeable improvement in early enrichment is seen.

#### 4. The time evolutions of the RMSD plots for the complexes of CAIR and AIR with PurE.

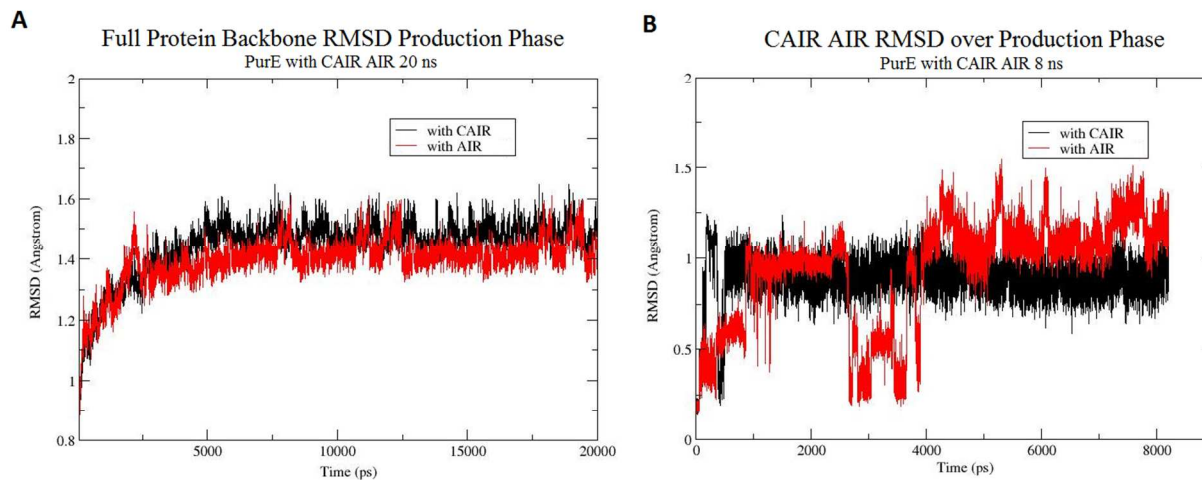

**Figure S3. The time evolutions of the RMSD plots for the complexes of CAIR and AIR with PurE.** A) Full protein backbone RMSD over 20 ns production phase; longer simulation time is shown here to ensure that the protein conformations have been converged. B) Ligands (AIR and CAIR) RMSD over 8 ns production phase.

**5. The time evolutions of enthalpy fluctuations for the complexes of CAIR and AIR with PurE.**

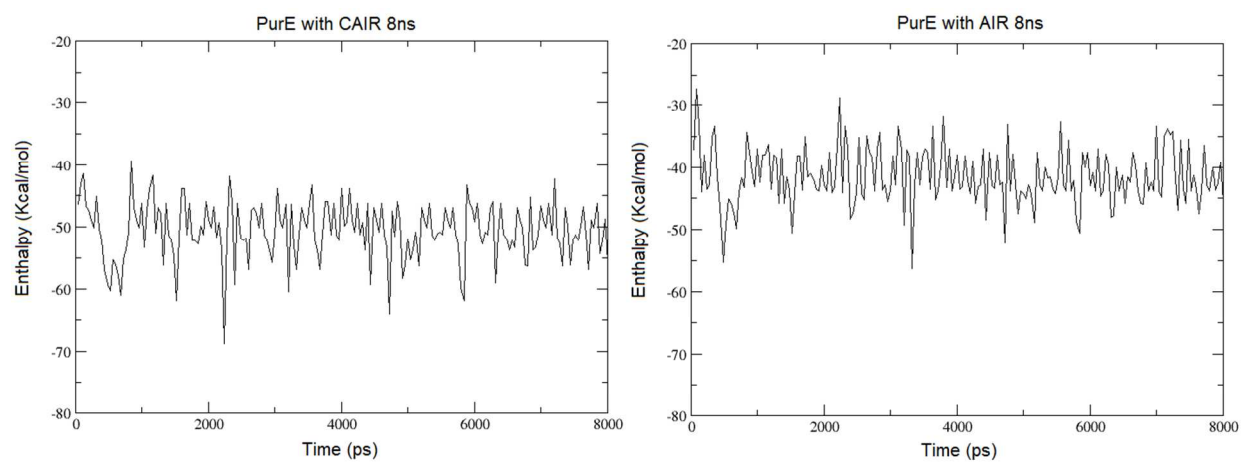

**Figure S4. The fluctuations of enthalpies for the complexes of CAIR and AIR with PurE.**

## 6. Effect of multiple conformations on enrichment.

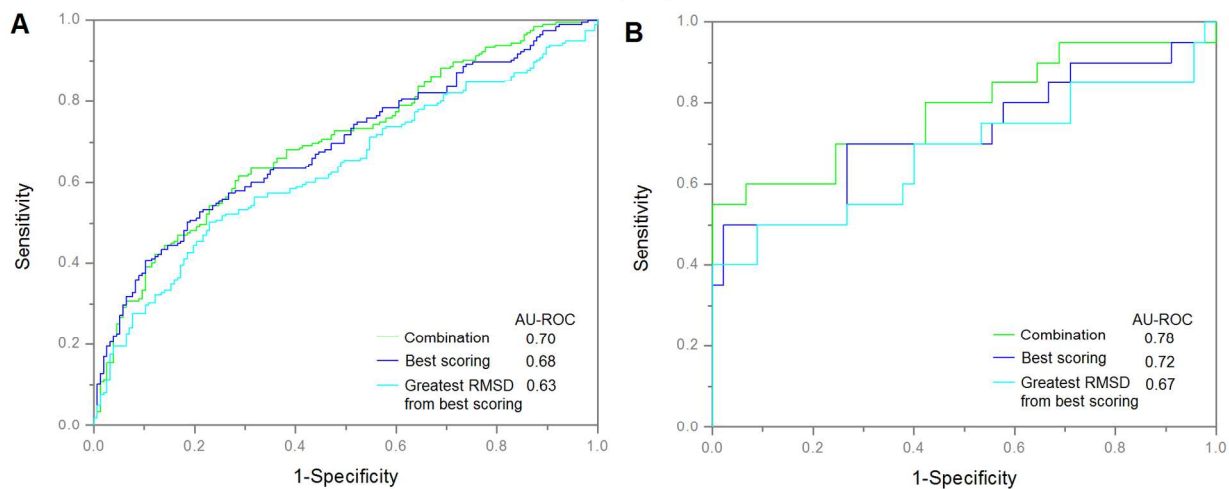

**Figure S5. ROC Comparison of multiple conformations vs. single conformation for MD-MM/PBSA screening.** **A.** The complete data set is shown; actives are defined as compounds determined to bind PurE by experimental methods. The AU-ROC value for the combination was not statistically significantly different from the best scoring conformation (AU-ROC: 0.68,  $p$ -value: 0.20), however, it is significant different from the greatest RMSD from the best scoring ones (AU-ROC: 0.63,  $p$ -value: 0.03). **B.** A 65 compound subset that has undergone CAIR competition studies is shown; actives are defined as compounds competitive for the CAIR ligand in the PurE active site. The AU-ROC value for the combination was statistically significantly different from the best scoring conformation (AU-ROC: 0.72,  $p$ -value: 0.01) or the greatest RMSD from the best scoring ones (AU-ROC: 0.67,  $p$ -value: <0.01).
